# Supplementary material for: Ventricular cell fate can be specified until the onset of myocardial differentiation
Source: PubMed Central journal article supplement (PMC4798847; doi:10.1016/j.mod.2016.01.001), 2016-02
Supplement: mmc1.pdf [file mmc1.pdf]

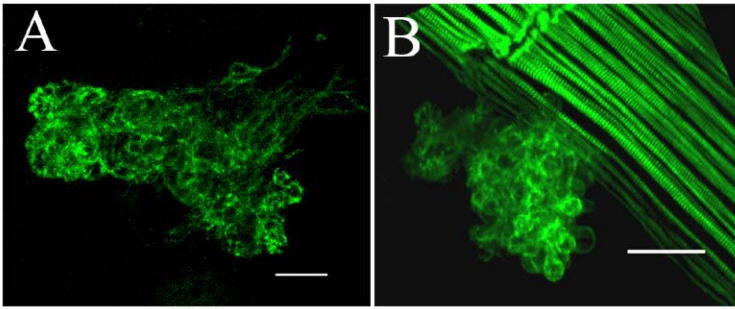

Figure S1

**Figure S1. Morphogenesis of Second Hearts.** Confocal microscopy was performed on SH (n=41; 73% beating) which were visualised by immunohistochemistry using anti-tropomyosin antibody CH1. (A) 35% of the SH showed morphology similar to a linear heart tube whilst (B) remaining SH were unstructured. (B) shows skeletal muscle staining in addition to SH.
